# Supplementary material for: Easy oxidatively induced silicon–carbon bond activation in organoplatinum chemistry
Source: Royal Society of Chemistry journal article supplement (doi:10.1039/b927248h), 2010-01-01
Supplement: b927248h.pdf [file b927248h.pdf]

## Easy Oxidatively Induced Silicon-Carbon Bond Activation in Organoplatinum Chemistry

Muhieddine Safa, Michael C. Jennings and Richard J. Puddephatt\*

### Electronic Supporting Information

#### Synthetic procedures

The complex  $[\text{Pt}_2\text{Me}_4(\mu\text{-SMe}_2)_2]$ ,  $[\text{Pt}_2(\text{CD}_3)_4(\mu\text{-SMe}_2)_2]$  and ligand  $\text{Me}_2\text{Si}(2\text{-C}_5\text{H}_4\text{N})_2$ , bps, were prepared according to the literature.<sup>1,2</sup>

**[PtMe<sub>2</sub>(bps)], 1.** To a stirring solution of bps (0.75 g, 3.48 mmol) in ether (10 mL) was added  $[\text{Pt}_2\text{Me}_4(\mu\text{-SMe}_2)_2]$  (1.0 g, 1.74 mmol). After 1h, the product precipitated from solution as a pale brown solid, which was separated, washed with ether (3 x 2 mL) and pentane (3 x 2 mL), and dried under vacuum. Yield: 88%. Anal. Calcd. for  $\text{C}_{14}\text{H}_{20}\text{N}_2\text{PtSi}$ : C, 38.26; H, 4.59; N, 6.37. Found: C, 38.53; H, 4.85; N, 6.33 %. NMR in  $\text{CDCl}_3$ :  $\delta(^1\text{H}) = 0.71$  [s, 6H,  $^2J_{\text{PtH}} = 80$  Hz, PtMe]; 0.77 [s, 3H, SiMe]; 1.11 [s, 3H, SiMe]; 7.21 [dd, 2H,  $^3J_{\text{HH}} = 7, 5$  Hz, H<sup>5</sup>]; 7.55 [d, 2H,  $^3J_{\text{HH}} = 7$  Hz, H<sup>3</sup>]; 7.67 [t, 2H,  $^3J_{\text{HH}} = 7$  Hz, H<sup>4</sup>]; 8.97 [d, 2H,  $^3J_{\text{HH}} = 5$  Hz,  $^3J_{\text{PtH}} = 25$  Hz, H<sup>6</sup>];  $\delta(^{13}\text{C}) = -18.5$  [PtMe]; -3.9 [SiMe]; -1.7 [SiMe]; 125.4 [C5]; 130.4 [C3]; 133.7 [C4]; 152.4 [C6]; 163.1 [C2]. Complex **1-d<sub>6</sub>** was prepared similarly from  $[\text{Pt}_2(\text{CD}_3)_4(\mu\text{-SMe}_2)_2]$ . The <sup>1</sup>H NMR spectrum was the same except that the methylplatinum resonance at  $\delta(^1\text{H}) = 0.71$  was absent.

**[Me(bps)Pt-OSiMe(2-C<sub>5</sub>H<sub>4</sub>N)<sub>2</sub>PtMe<sub>3</sub>][B(OCH<sub>2</sub>CF<sub>3</sub>)(C<sub>6</sub>F<sub>5</sub>)<sub>3</sub>],**

**2[B(OCH<sub>2</sub>CF<sub>3</sub>)(C<sub>6</sub>F<sub>5</sub>)<sub>3</sub>].** To a solution of **1** (0.09 g, 0.45 mmol) in  $\text{CF}_3\text{CH}_2\text{OH}$  (5 mL) was added a solution of  $\text{B}(\text{C}_6\text{F}_5)_3$  (0.11 g, 0.45 mmol) in  $\text{CF}_3\text{CH}_2\text{OH}$  (5 mL). The mixture was stirred for 2 d, then the volume of the solution was reduced to 2 mL, and the mixture was stored at 0 °C for 2 d., to give the product as colourless crystals, which were separated and dried under vacuum. Yield 37 %. Anal. Calcd. for  $\text{C}_{47}\text{H}_{39}\text{BF}_{18}\text{N}_4\text{O}_2\text{Pt}_2\text{Si}_2 \cdot 2\text{H}_2\text{O}$ : C, 36.97; H, 2.84; N, 3.67. Found: C, 36.77; H, 2.32; N, 3.62 %. NMR in acetone-*d*<sub>6</sub>:  $\delta(^1\text{H}) = 0.15$  [s, 3H,  $^2J_{\text{PtH}} = 69$  Hz,  $\text{MePt}^{\text{IV}}$  *trans* N]; 0.64 [s, 3H,  $^2J_{\text{PtH}} = 75$  Hz,  $\text{MePt}^{\text{II}}$  *trans* N]; 0.95 [s, 3H, bps SiMe]; 1.17 [s, 3H,  $^2J_{\text{PtH}} = 68$  Hz,  $\text{MePt}^{\text{IV}}$  *trans* N]; 1.22 [s, 3H, OSiMe]; 1.23 [s, 3H,  $^2J_{\text{PtH}} = 78$  Hz,  $\text{MePt}^{\text{IV}}$  *trans* O]; 1.63 [s, 3H, bps SiMe]; 3.57 [q, 2H,  $^3J_{\text{HF}} = 12$  Hz, CH<sub>2</sub>]; 7.01 [m, 1H, H<sup>5d</sup>]; 7.38 [m, 1H, H<sup>5a</sup>]; 7.61 [m, 1H, H<sup>5c</sup>]; 7.64 [m, 1H, H<sup>5b</sup>]; 7.74 [m, 1H, H<sup>3a</sup>]; 7.83 [m, 1H, H<sup>4d</sup>]; 7.88 [m, 1H, H<sup>3d</sup>]; 7.96 [m, 1H, H<sup>4a</sup>]; 8.07 [m, 2H, H<sup>3b</sup>, H<sup>4b</sup>]; 8.11 [m, 1H, H<sup>4c</sup>]; 8.15 [m, 1H, H<sup>3c</sup>]; 8.49 [m, 1H,  $^3J_{\text{PtH}} = 20$  Hz, H<sup>6d</sup>]; 8.60 [m, 1H,  $^3J_{\text{PtH}} = 20$  Hz, H<sup>6c</sup>]; 8.72 [m, 1H,  $^3J_{\text{PtH}} = 21$  Hz, H<sup>6b</sup>]; 8.96 [m, 1H,  $^3J_{\text{PtH}} = 65$  Hz, H<sup>6a</sup>].  $\delta(^{19}\text{F}) = -75$  [br, 3F, CF<sub>3</sub>]; -133 [br m, 6F, F<sup>2</sup>, F<sup>6</sup>]; -164 [m, 3F, F<sup>4</sup>]; -168 [br, 6F, F<sup>3</sup>, F<sup>5</sup>].

**[Me<sub>3</sub>Pt(HOSiMe(2-C<sub>5</sub>H<sub>4</sub>N)<sub>2</sub>)[PhCO<sub>2</sub>], 3c.** To a solution of complex **1** (0.05 g, 0.12 mmol) in acetone (10 mL) was added dibenzoyl peroxide (0.03 g, 0.12 mmol). The mixture was stirred for 2 h., the volume was reduced to 1 mL, and pentane (5 mL) was added to precipitate the product as a white solid, which was separated, washed with ether (3 x 2 mL) and pentane (3 x 2 mL), and dried under vacuum. NMR in  $\text{CD}_2\text{Cl}_2$ :  $\delta(^1\text{H}) =$

1.04 [s, 3H, Si-Me]; 1.05 [s, 6H,  $^2J_{\text{PtH}} = 70$  Hz, MePt *trans* N]; 1.14 [s, 3H,  $^2J_{\text{PtH}} = 75$  Hz, MePt *trans* O]; 2.12 [s, 1H, OH]; 7.37 [m, 4H, H<sup>5</sup>, H<sup>m</sup>]; 7.46 [m, 1H, H<sup>p</sup>]; 7.75 [m, 2H, H<sup>3</sup>]; 7.80 [m, 2H, H<sup>4</sup>]; 7.95 [m, 2H, H<sup>o</sup>]; 8.58 [m, 2H,  $^3J_{\text{PtH}} = 20$  Hz, H<sup>6</sup>].

#### Monitoring of reactions by $^1\text{H}$ NMR and ESI-MS.

In a typical reaction, complex **1** (1 mg) was dissolved in CD<sub>3</sub>OD (1 mL), and then excess hydrogen peroxide (0.01 mL) was added to the solution to give [Me<sub>3</sub>Pt(HOSiMe(2-C<sub>5</sub>H<sub>4</sub>N)<sub>2</sub>)[OH], **3b**. The  $^1\text{H}$  NMR spectrum was recorded immediately and then at intervals for several days. NMR in CD<sub>3</sub>OD after 4 min.:  $\delta(^1\text{H}) = 0.94$  [s, 3H, SiMe]; 0.98 [s, 6H,  $^2J_{\text{PtH}} = 69$  Hz, MePt *trans* N]; 1.15 [s, 3H,  $^2J_{\text{PtH}} = 75$  Hz, MePt *trans* O]; 7.43 [m, 2H, H<sup>5</sup>]; 7.80 [m, 2H, H<sup>3</sup>]; 7.86 [m, 2H, H<sup>4</sup>]; 8.62 [m, 2H,  $^3J_{\text{PtH}} = 20$  Hz, H<sup>6</sup>];  $\delta(^{13}\text{C}) = -10.7$  [PtMe]; -10.4 [PtMe]; -4.6 [SiMe]; 123.4 [C5]; 129.1 [C3]; 136.5 [C4]; 146.5 [C6]; 165.8 [C2]. The similar reaction with **1-d<sub>6</sub>** to give **3b\*** gave identical  $^1\text{H}$  NMR data except that the resonance at  $\delta(^1\text{H}) = 0.98$  was absent. The complexes decomposed slowly over several days.

Similar reactions in MeOH were monitored by ESI-MS: Complexes **3b** and **3b\*** gave an envelope of peaks at  $m/z = 456$  and  $462$  respectively, as expected for [Me<sub>3</sub>Pt(HOSiMe(2-C<sub>5</sub>H<sub>4</sub>N)<sub>2</sub>)<sup>+</sup> and [Me<sub>3</sub>Pt(HOSiMe(2-C<sub>5</sub>H<sub>4</sub>N)<sub>2</sub>)<sup>+</sup>-d<sub>6</sub>, and also at 911 and 923 respectively, as expected for [H{Me<sub>3</sub>Pt(OSiMe(2-C<sub>5</sub>H<sub>4</sub>N)<sub>2</sub>)<sub>2</sub>}<sup>+</sup> and [H{Me<sub>3</sub>Pt(OSiMe(2-C<sub>5</sub>H<sub>4</sub>N)<sub>2</sub>)<sub>2</sub>}<sup>+</sup>-d<sub>12</sub>.

**[PtI<sub>2</sub>Me<sub>2</sub>(bps)], 4.** To a stirred solution of **1** (0.02 g, 0.455 mmol) in CH<sub>2</sub>Cl<sub>2</sub> (5 mL) was added excess iodine (0.012 g). The mixture was stirred for 2 h., the solvent was removed under vacuum, and the red product was washed with pentane (3 x 3 mL) and ether (3 x 3 mL) and dried under vacuum. Yield 84%. NMR in CD<sub>2</sub>Cl<sub>2</sub>:  $\delta(^1\text{H}) = 0.81$  [s, 6H, Si-Me]; 2.39 [s, 6H,  $^2J_{\text{PtH}} = 71$  Hz, PtMe]; 7.42 [m, 2H, H<sup>5</sup>]; 7.78 [m, 2H, H<sup>3</sup>]; 7.86 [m, 2H, H<sup>4</sup>]; 9.36 [m, 2H,  $^3J_{\text{PtH}} = 25$  Hz, H<sup>6</sup>].

**Structure Determinations:** Data were collected at low temperature (150 K) using a Nonius Kappa-CCD area detector diffractometer. Details are in the cif files. Figures are shown with 25% thermal ellipsoids.

#### Crystal data:

**1:** C<sub>14</sub>H<sub>20</sub>N<sub>2</sub>PtSi, fw = 439.50, monoclinic, C2/c, a = 15.2967(7), b = 12.8601(6), c = 15.8369(8) Å,  $\beta = 102.191(3)^\circ$ , V = 3045.1(3) Å<sup>3</sup>, Z = 8, d(calc) = 1.917 Mg m<sup>-3</sup>, R1 = 0.0469, wR2 = 0.1124 [I > 2s(I)].

**2:** C<sub>47</sub>H<sub>39</sub>BF<sub>18</sub>N<sub>4</sub>O<sub>2</sub>Pt<sub>2</sub>Si<sub>2</sub>, fw = 1490.99, triclinic, P-1, a = 11.812(2), b = 13.535(3), c = 16.700(3) Å,  $\alpha = 79.94(3)$ ,  $\beta = 80.78(3)$ ,  $\gamma = 79.76(3)^\circ$ , V = 2564.0(9) Å<sup>3</sup>, Z = 2, d(calc.) = 1.931 Mg m<sup>-3</sup>, R1 = 0.0437, wR2 = 0.0972 [I > 2s(I)].

**3c:** C<sub>21</sub>H<sub>26</sub>N<sub>2</sub>O<sub>3</sub>PtSi, fw = 577.62, monoclinic, P2<sub>1</sub>/n, a = 14.305(3), b = 10.130(2), c = 14.985(3) Å,  $\beta = 99.04(3)^\circ$ , V = 2144.6(7) Å<sup>3</sup>, Z = 4, d(calc) = 1.789 Mg m<sup>-3</sup>, R1 = 0.0298, wR2 = 0.0732 [I > 2s(I)].

**4:** C<sub>14</sub>H<sub>20</sub>I<sub>2</sub>N<sub>2</sub>PtSi, fw = 693.30, monoclinic, P2<sub>1</sub>/n, a = 9.3692(3), b = 13.7960(5), c = 14.4724(5) Å,  $\beta = 100.964(2)^\circ$ , V = 1836.52(11) Å<sup>3</sup>, Z = 4, d(calc) = 2.507 Mg m<sup>-3</sup>, R1 = 0.0507, wR2 = 0.1369 [I > 2s(I)].

## References

- 1 M.E. Wright, *Tet. Lett.*, 1987, **28**, 3233.
- 2 J.D. Scott and R.J. Puddephatt, *Organometallics*, 1983, **2**, 1643.
